# Supplementary material for: Direct Cu2+ ion-exchanged into as-synthesized SAPO-34 and its catalytic application in the selective catalytic reduction of NO with NH3
Source: Royal Society of Chemistry journal article supplement (doi:10.1039/c5ra22868a), 2016-01-01
Supplement: c5ra22868a1.pdf [file c5ra22868a1.pdf]

## Supporting information

### Direct Cu<sup>2+</sup> ion-exchanged into as-synthesized SAPO-34 and its catalytic application in the selective catalytic reduction of NO with NH<sub>3</sub>

Xiao Xiang,<sup>ab</sup> Miao Yang,<sup>a</sup> Beibei Gao,<sup>ab</sup> Yuyan Qiao,<sup>ab</sup> Peng Tian,<sup>a\*</sup> Shutao Xu,<sup>a</sup> Zhongmin Liu<sup>a\*</sup>

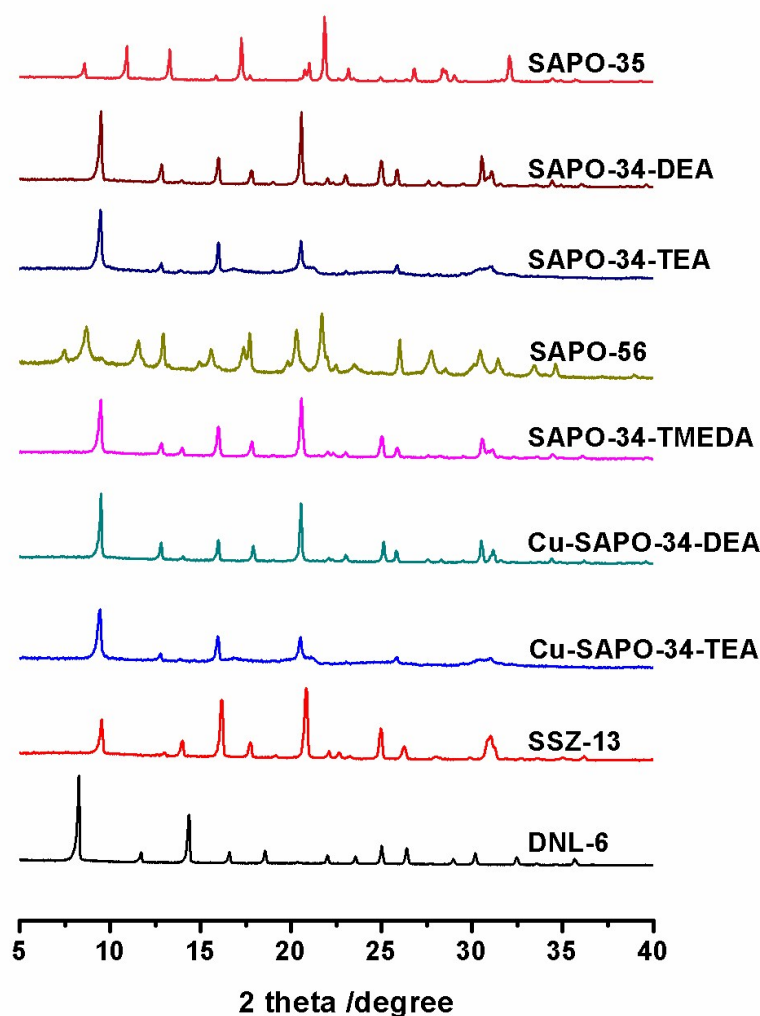

**Fig. S1** XRD patterns of the as-synthesized precursors and the Cu ion-exchanged samples. Cu-SAPO-34-DEA and Cu-SAPO-34-TEA are the samples Cu-DEA-D5 and Cu-TEA-D2 in Table 1 respectively.

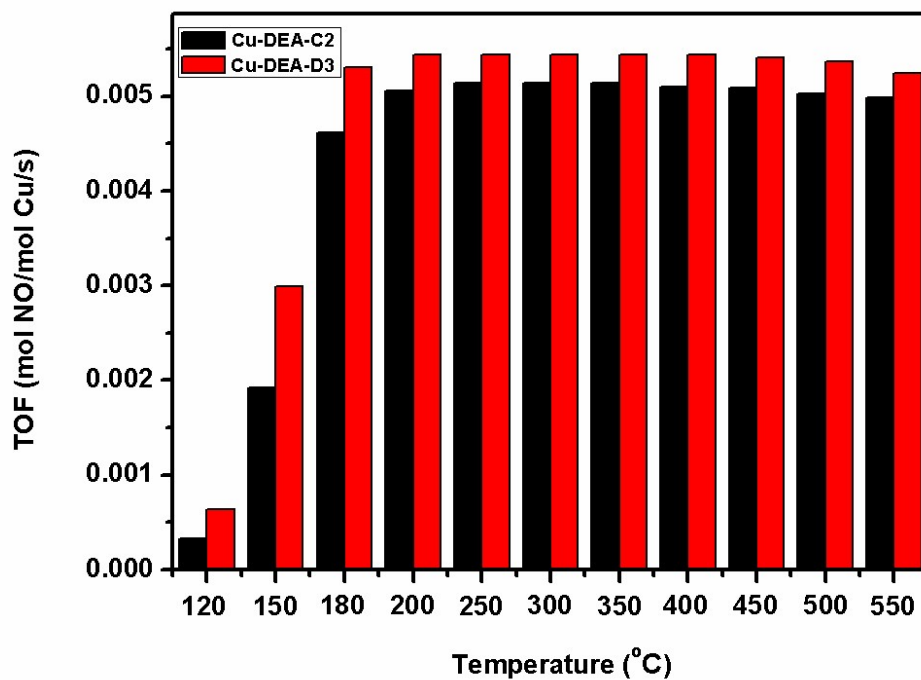

**Fig. S2** The TOF ( $\text{mol}_{\text{NO}}/\text{mol}_{\text{Cu}}/\text{s}$ ) of the catalysts calculated from the standard  $\text{NH}_3$ -SCR reaction with the feed gas of 500 ppm  $\text{NH}_3$ , 500 ppm  $\text{NO}$ , 5%  $\text{O}_2$ , and 5%  $\text{H}_2\text{O}$  with  $\text{N}_2$  as the balance. The volume hourly space velocity was  $180,000 \text{ h}^{-1}$ .
